# Supplementary material
Source: PubMed Central journal article supplement (PMC1888676)

# Supplementary Figure 1

a

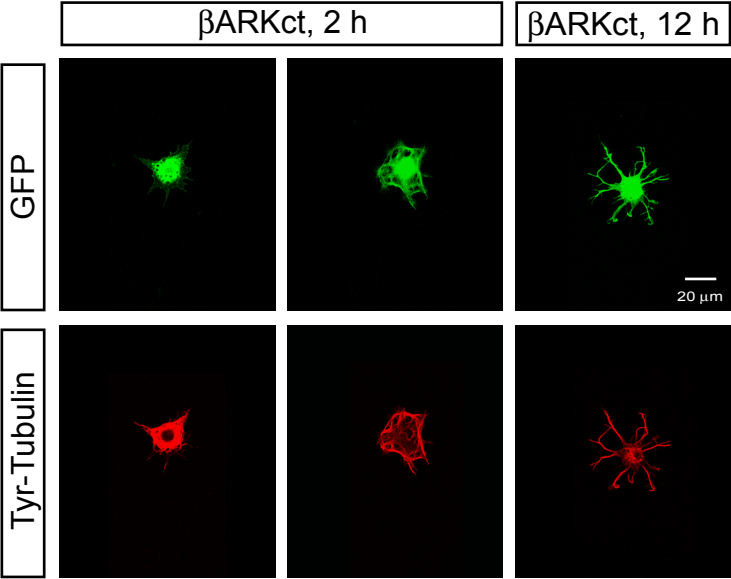

b

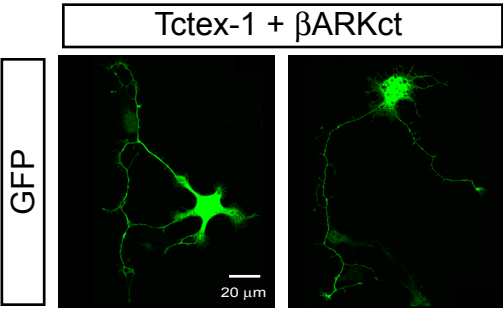

Supplement: 7601716s2.pdf [file 7601716s2.pdf]

# Supplementary Figure 2

PC12 Lysate  
IB: Anti-Tctex-1 mAb

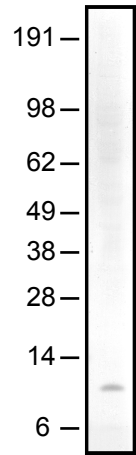

Supplement: 7601716s3.pdf [file 7601716s3.pdf]
